# Supplementary material for: Could Fibroblast Activation Protein (FAP)-Specific Radioligands Be Considered as Pan-Tumor Agents?
Source: Contrast Media Mol Imaging. 2022 Feb 22;2022:3948873. doi: 10.1155/2022/3948873 (PMC8888077; doi:10.1155/2022/3948873)
Supplement: Supplementary Materials — Supplementary Table 1: summary of clinical studies on FAP-tracers. Supplementary Table 2: characteristics of FAP-tracers. Supplementary Table 3: summary of case reports on FAP-tracers. [file 3948873.f1.zip]

Archive with 3 entries (3 files):
- 3948873.f1/Supplementary table 1 (1) (1).docx
- 3948873.f1/Supplementary table 2 (1).docx
- 3948873.f1/Supplementary table 3 (1).docx
